# Supplementary material for: Bimodal sensing of guidance cues in mechanically distinct microenvironments
Source: PubMed Central journal article supplement (PMC6244288; doi:10.1038/s41467-018-07290-y), 2018-11-20
Supplement: 41467_2018_7290_MOESM3_ESM.pdf [file 41467_2018_7290_MOESM3_ESM.pdf]

**Editorial Note:** this manuscript has been previously reviewed at another journal that is not operating a transparent peer review scheme. This document only contains reviewer comments and rebuttal letters for versions considered at Nature Communications.

REVIEWERS' COMMENTS:

Reviewer #1 (Remarks to the Author):

I recommend acceptance of the current version of the manuscript in Nature Communications.

**RESPONSE TO REVIEWER 1**

Reviewer #1 (Remarks to the Author):

I recommend acceptance of the current version of the manuscript in Nature Communications.

**Response:** We thank the Reviewer for their comment and have edited the manuscript according to the Editor's guidelines to meet the formatting requirements of Nature Communications.
